# Supplementary material for: The pressing-induced formation of a large-area supramolecular film for oil capture
Source: Royal Society of Chemistry journal article supplement (doi:10.1039/d0qm00006j), 2020-01-01
Supplement: d0qm00006j1.pdf [file d0qm00006j1.pdf]

## Supporting Information

### Pressing-Induced Large-Scale Supramolecular Film for Oil Capture

*Wenkai Wang, Mengqi Xie, Hongjun Jin, Wanwan Zhi, Kaerdun Liu, Cheng Ma, Peilong Liao, Jianbin Huang, Yun Yan\**

**Table S1.** Table of a comparison of theoretical and experimental results of Elemental Analysis of DTTAB-PSS.

| Element      | N                                                                                                   | C     | H     |
|--------------|-----------------------------------------------------------------------------------------------------|-------|-------|
| Experimental | 2.14                                                                                                | 69.76 | 11.65 |
| Theoretical  | 2.14                                                                                                | 69.75 | 10.94 |
| Final Result | <b>C<sub>30</sub>H<sub>64</sub>BrN C<sub>8</sub>H<sub>7</sub>NaO<sub>3</sub>S • 2H<sub>2</sub>O</b> |       |       |

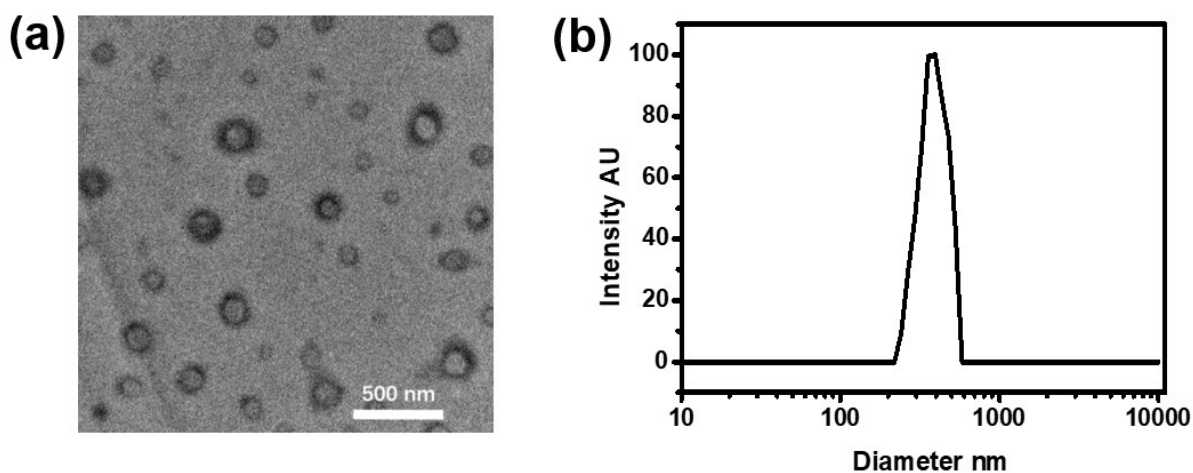

**Figure S1.** (a) TEM image of vesicles in 20 mM DTTAB, (b) DLS result for the diameter of the vesicles in 20 mM DTTAB. (T= 20 °C)

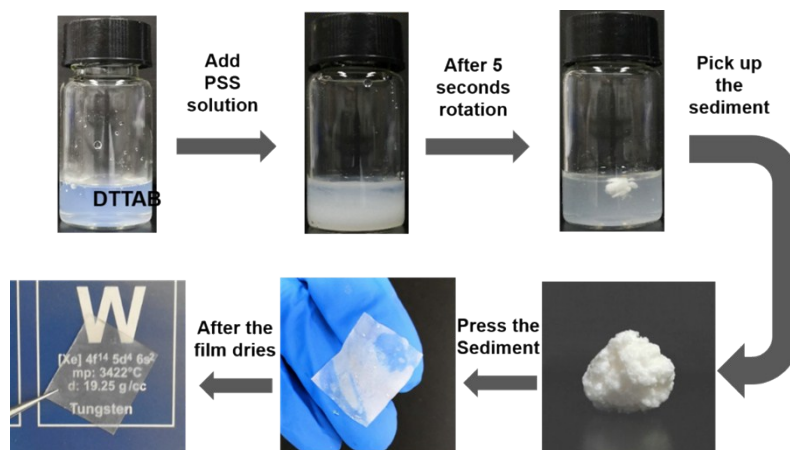

**Figure S2.** Optical images of the preparation process of DTTAB -PSS film.

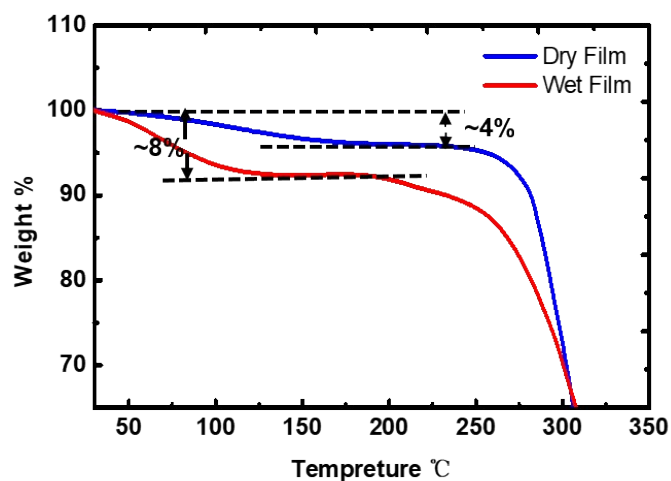

**Figure S3.** TGA results for the dry and wet DTTAB-PSS film (30°C—300°C).

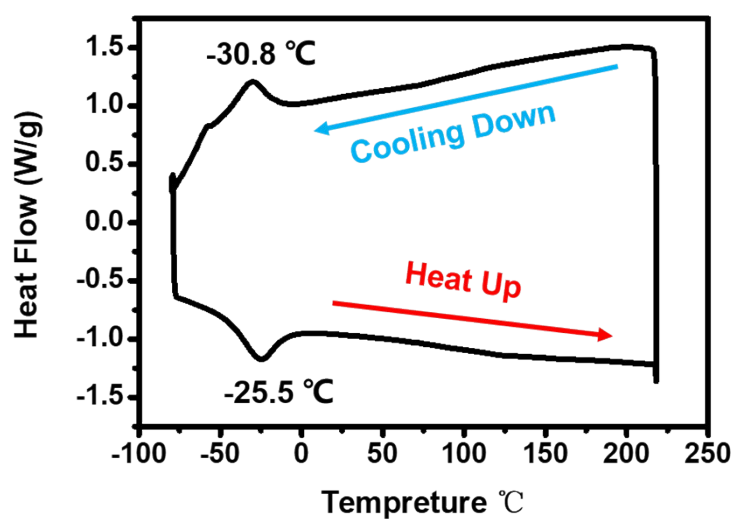

**Figure S4.** DSC trace of DTTAB-PSS film.

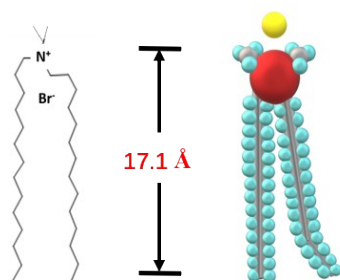

**Figure S5.** The chemical structure, length and model of DTTAB.

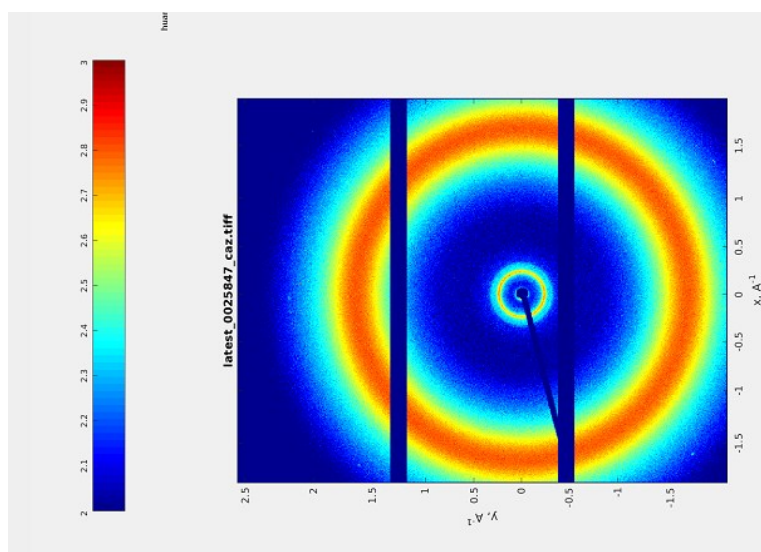

**Figure S6.** 2D XRD patterns for DTTAB-PSS film.

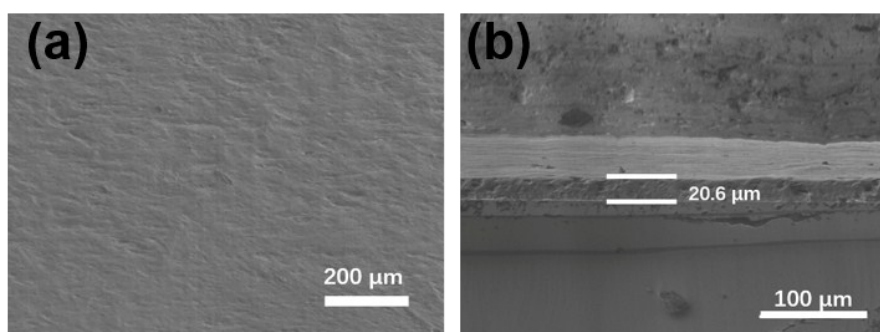

**Figure S7.** (a) SEM image of the surface of DTTAB-PSS film and (b) SEM image of the cross section of DTTAB-PSS film, which are prepared by hand pressure.

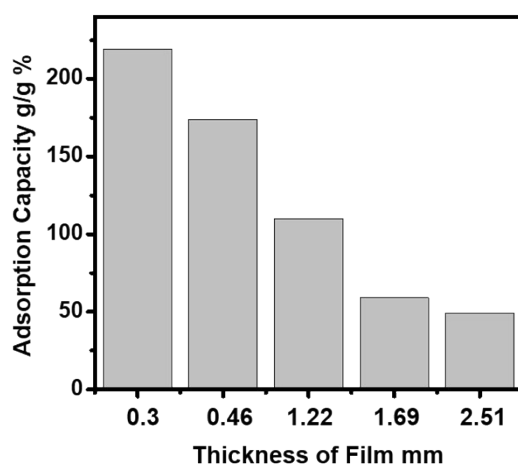

**Figure S8.** The influence of film thickness (0.30 mm, 0.46 mm, 1.22 mm 1.69 mm and 2.51 mm) on relative adsorption capacity toward petroleum.

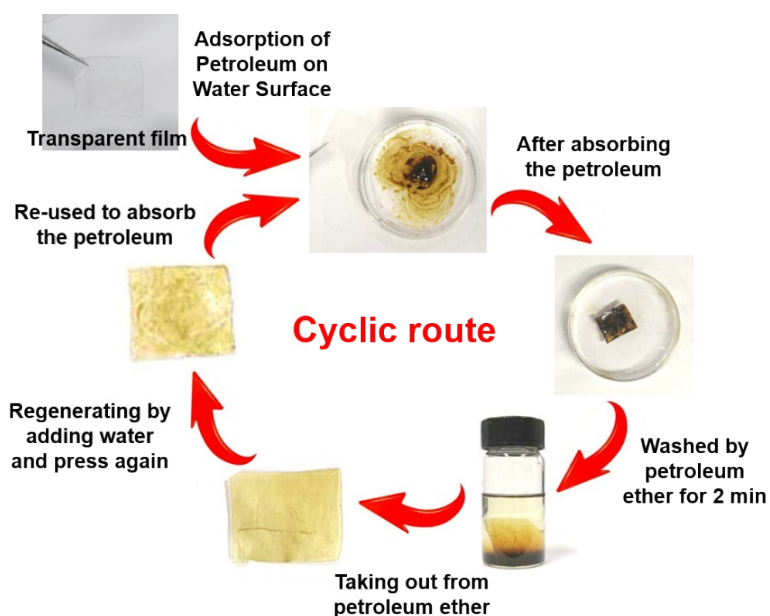

**Figure S9.** Schematic diagram of recycle of the film for petroleum adsorption in DI water.

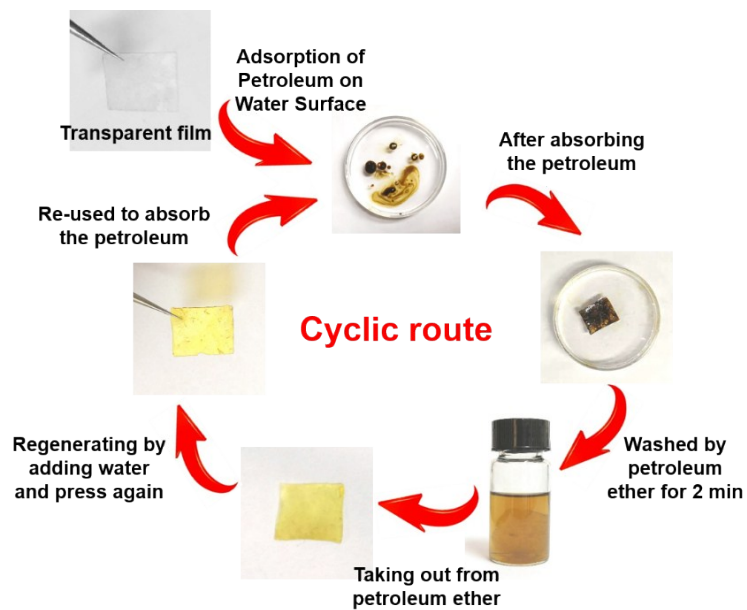

**Figure S10.** Schematic diagram of recycle of the film for petroleum adsorption in 33 wt. % NaCl solution.

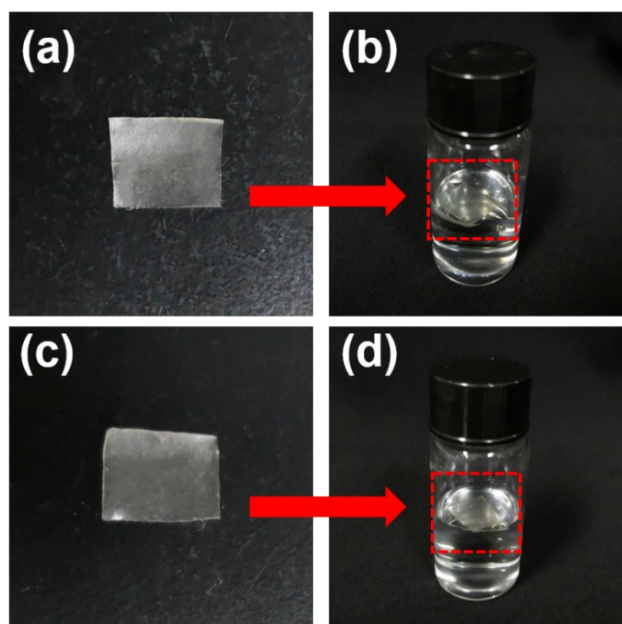

**Figure S11.** Photographs of DTTAB-PSS film immersed in DI water (a) before and (b) after 72 h, respectively; Photographs of DTTAB-PSS film immersed in 33 wt. % NaCl solution (c) before and d) after 72 h, respectively.

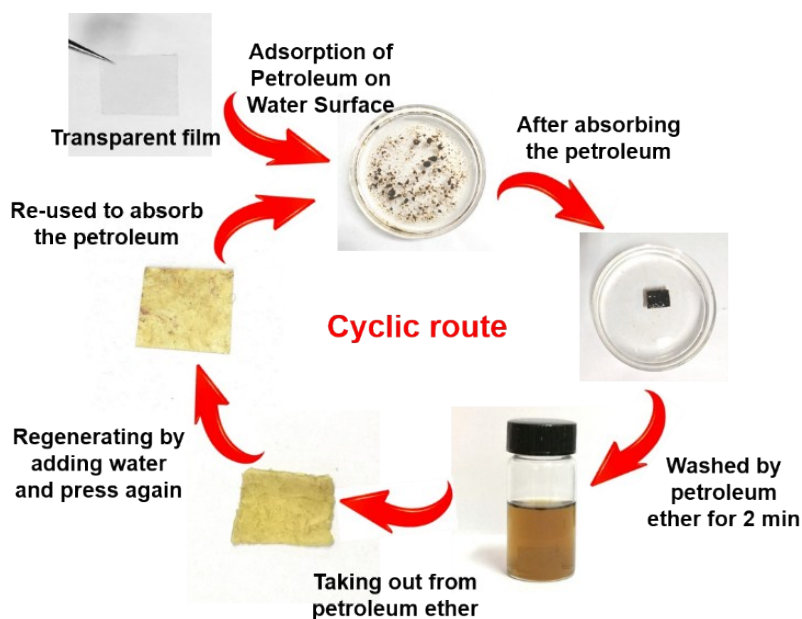

**Figure S12.** Schematic diagram of recycle of the film for petroleum adsorption in dirty water that contains many dusts, respectively.

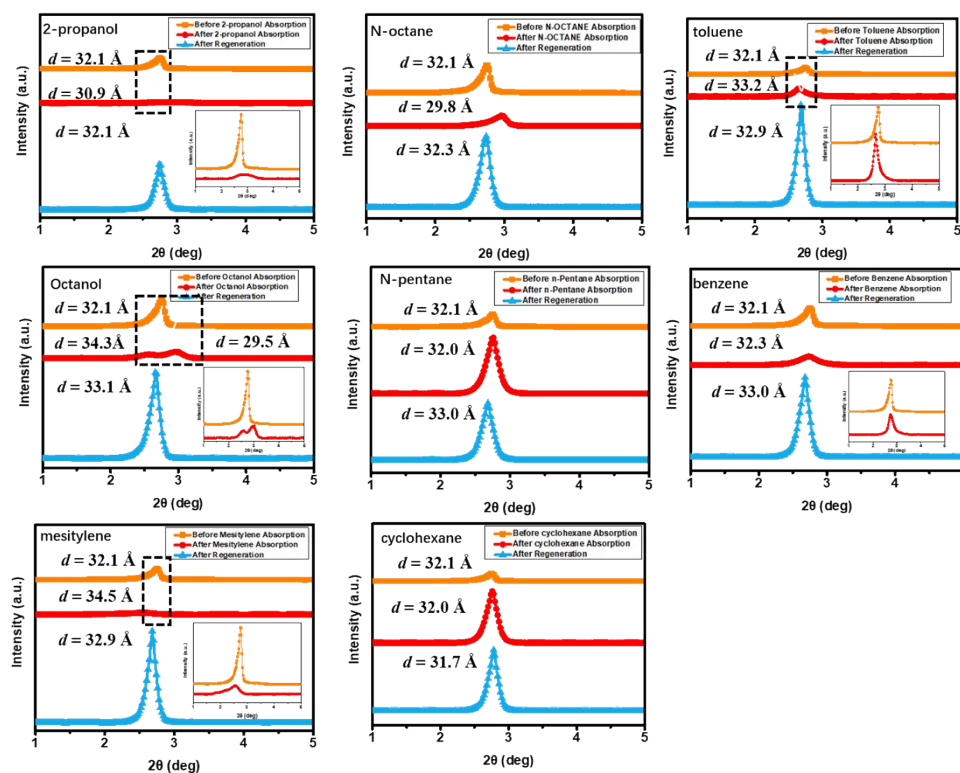

**Figure S13.** XRD patterns of DTTAB-PSS film during before adsorption, after adsorption and after regeneration for different 9 organic solvents, respectively.
